# Supplementary material for: Phase transition kinetics of LiNi0.5Mn1.5O4 electrodes studied by in situ X-ray absorption near-edge structure and X-ray diffraction analysis
Source: Royal Society of Chemistry journal article supplement (doi:10.1039/c3ta11637a), 2013-01-01
Supplement: c3ta11637a.pdf [file c3ta11637a.pdf]

**Supplementary Information for**  
**Phase Transition Kinetics of  $\text{LiNi}_{0.5}\text{Mn}_{1.5}\text{O}_4$  Electrodes Studied by *In Situ* X-ray**  
**Absorption Near-Edge Structure and X-ray Diffraction Analysis**

Hajime Arai, Kenji Sato, Yuki Orikasa, Haruno Murayama, Ikuma Takahashi, Yukinori Koyama, Yoshiharu Uchimoto and Zempachi Ogumi

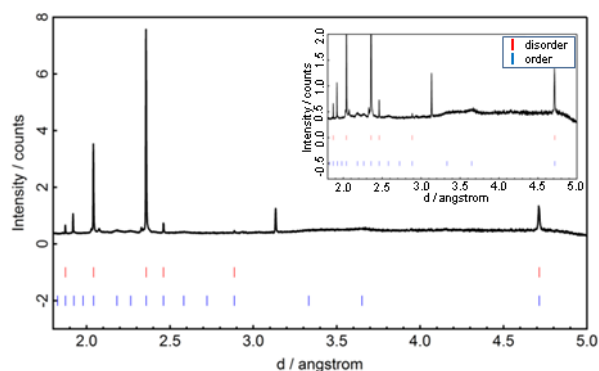

**Fig. S1** Neutron diffraction pattern of  $\text{LiNi}_{0.5}\text{Mn}_{1.5}\text{O}_4$  powder. The inset shows the magnified pattern.

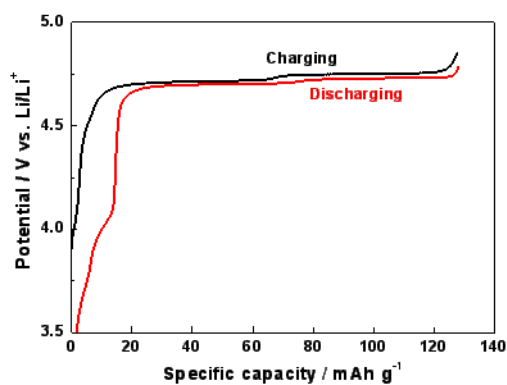

**Fig. S2** Potential profiles of  $\text{LiNi}_{0.5}\text{Mn}_{1.5}\text{O}_4$  electrode during 0.1 C rate charging and discharging.

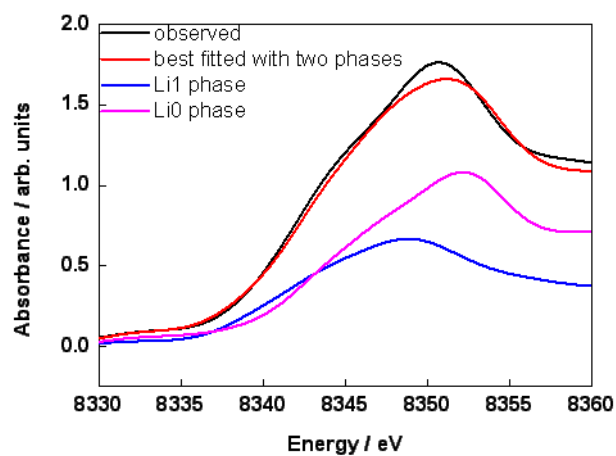

**Fig. S3** XANES profile of  $\text{Li}_{0.5}\text{Ni}_{0.5}\text{Mn}_{1.5}\text{O}_4$  (Li1/2). The profiles of the  $\text{LiNi}_{0.5}\text{Mn}_{1.5}\text{O}_4$  (Li1) and  $\text{Ni}_{0.5}\text{Mn}_{1.5}\text{O}_4$  (Li0) phases are shown together with the best fitted one to reproduce the profile of  $\text{Li}_{0.5}\text{Ni}_{0.5}\text{Mn}_{1.5}\text{O}_4$ .

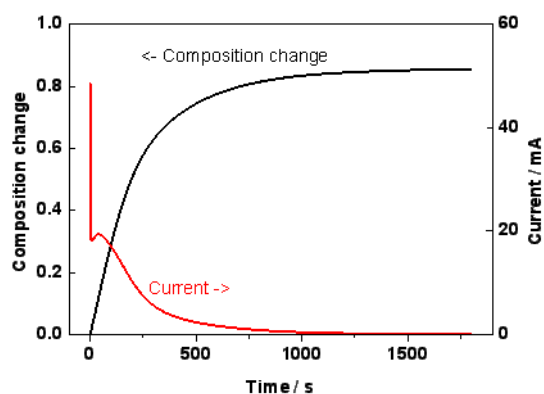

**Fig. S4** Lithium composition change and current profiles of  $\text{LiNi}_{0.5}\text{Mn}_{1.5}\text{O}_4$  electrode during potential step charging experiment from fully discharged state to 4.85 V vs.  $\text{Li/Li}^+$ .

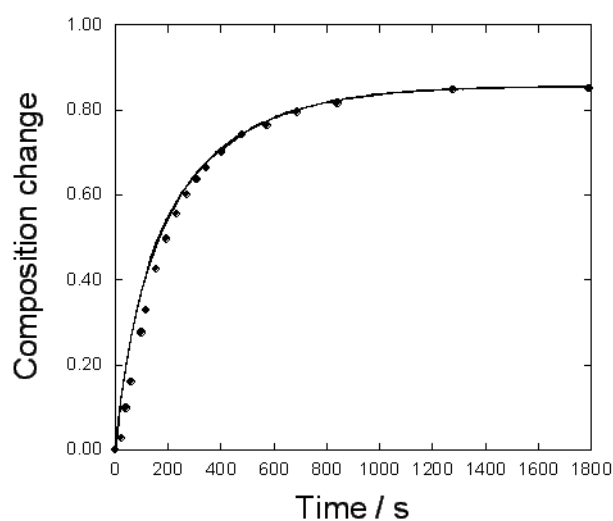

**Fig. S5** Lithium composition change of  $\text{LiNi}_{0.5}\text{Mn}_{1.5}\text{O}_4$  electrode during potential step charging experiment from fully discharged state to 4.85 V vs.  $\text{Li}/\text{Li}^+$ . The dots and the solid curves are the changes independently evaluated using the experimentally obtained XANES spectra and current responses, respectively.

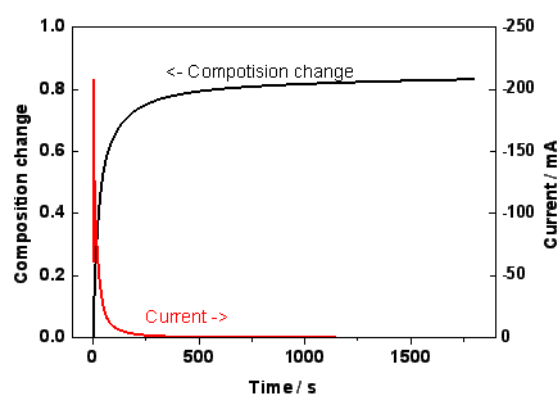

**Fig. S6** Lithium composition change and current profiles of  $\text{LiNi}_{0.5}\text{Mn}_{1.5}\text{O}_4$  electrode during potential step discharging experiment from fully charged state to 3.50 V vs.  $\text{Li}/\text{Li}^+$ .

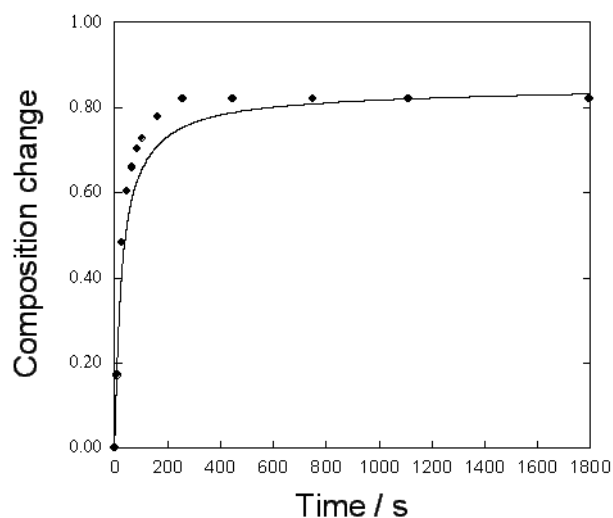

**Fig. S7** Lithium composition change of  $\text{LiNi}_{0.5}\text{Mn}_{1.5}\text{O}_4$  electrode during potential step discharging experiment from fully charged state to 3.50 V vs.  $\text{Li}/\text{Li}^+$ . The dots and the solid curves are the changes independently evaluated using the experimentally obtained XANES spectra and current responses, respectively.

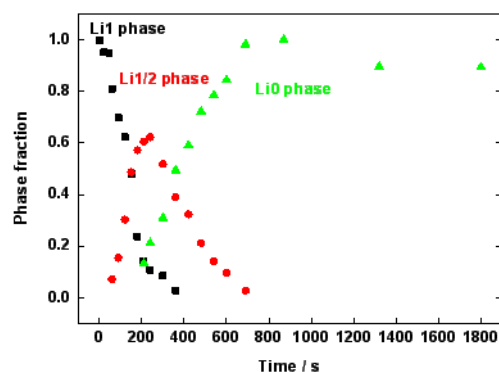

**Fig. S8** Phase fractions of  $\text{LiNi}_{0.5}\text{Mn}_{1.5}\text{O}_4$  (Li1),  $\text{Li}_{0.5}\text{Ni}_{0.5}\text{Mn}_{1.5}\text{O}_4$  (Li1/2) and  $\text{Ni}_{0.5}\text{Mn}_{1.5}\text{O}_4$  (Li0) evaluated using XRD patterns during potential step charging experiment from fully discharged state to 4.85 V vs.  $\text{Li}/\text{Li}^+$ .

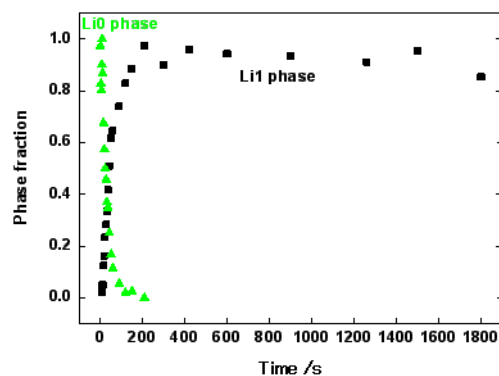

**Fig. S9** Phase fractions of  $\text{LiNi}_{0.5}\text{Mn}_{1.5}\text{O}_4$  (Li1) and  $\text{Ni}_{0.5}\text{Mn}_{1.5}\text{O}_4$  (Li0) evaluated using XRD patterns during potential step discharging experiment from fully charged state to 3.50 V vs.  $\text{Li/Li}^+$ .
